# Supplementary material
Source: PubMed Central journal article supplement (PMC5291020)
Supplement: supp_pp.16.01923_PP2016-01138D_Supplemental_Material_File.pdf [file supp_pp.16.01923_PP2016-01138D_Supplemental_Material_File.pdf]

1 **SUPPLEMENT MATERIALS FOR CURTIN, et al. “Validating genome-wide association**  
2 **candidates: Selecting, testing, and characterizing genes that control quantitative variation in**  
3 **rhizobial nodulation”**

4

5 1. Figures

- 6 S1. The characterization of three Tnt1 mutant lines
- 7 S2. The characterization of two whole-plant hairpin lines
- 8 S3. The characterization of the *Pho2-like* CRISPR/Cas9 mutants
- 9 S4. The characterization of the *Erdj2* CRISPR/Cas9 mutants
- 10 S5. The characterization of the *Acre-1* CRISPR/Cas9 mutants
- 11 S6. The characterization of the *Pen3-like* CRISPR/Cas9 mutants
- 12 S7. The characterization of the *Fmo1-like, Hlz-1 and Mel1-like* CRISPR/Cas9 mutants
- 13 S8. Nodulation phenotype of *dmi3* and *ipd3-2*
- 14 S9. The Tnt1 insertion background of the NF12360 Tnt1 mutant line
- 15 S10. WT and *Pho2-like, Pen3-like, and Pno1-like* mutant nodules at 14 dpi
- 16 S11. WT and *Pho2-like, Pen3-like, and Pno1-like* mutant dissected nodules at 14 dpi
- 17 S12. The expression analysis of validated genes, derived from the *Medicago truncatula*  
18 Gene Expression Atlas (<http://mtgea.noble.org/v3/index.php>)

19

20

21 2. Tables

- 22 S1. List of Tnt1 mutant lines obtained from Noble Foundation Tnt1 mutant database
- 23 S2. Statistical tests comparing phenotype between mutant and wild-type control plants
- 24 S3. Primer sequences for PCR assays and vector construction (SEPARATE EXCEL FILE)

25

26

27 3. Supplemental Methods1

- 28 1. CRISPR reagent design and construction

29

30

31

32 **Supplemental Figures**

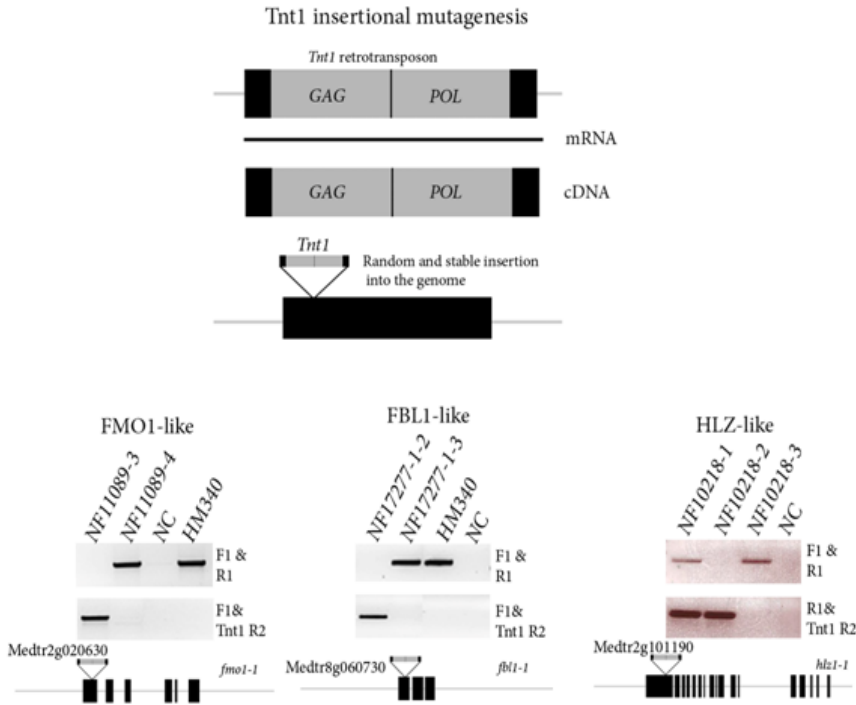

33

34

35 **Fig. S1 The characterization of three *Tnt1* mutant lines.** Primers were designed to span the  
36 putative insertion site based on the FST sequences obtained from the *Tnt1* mutant database.  
37 PCR using candidate gene and *Tnt1* specific primers were used to identify homozygous *Tnt1*  
38 insertion and wild-type plants. Primers sequences can be found in the Supplemental Table3.

39

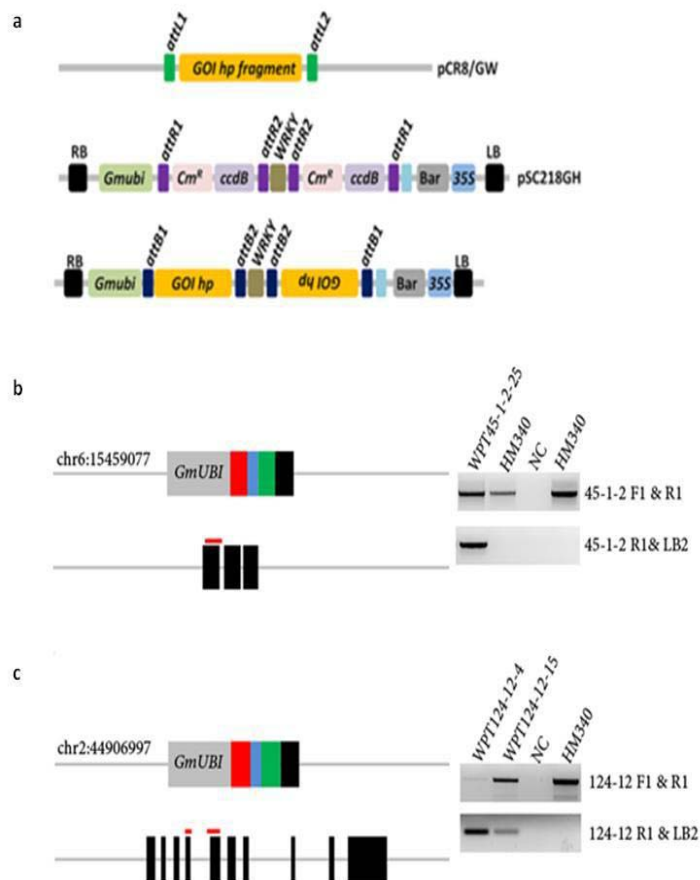

40  
41

42 **Fig. S2 The characterization of two whole-plant hairpin lines.** **a**, Schematic representation of  
 43 the hairpin vector assembly. **b**, The genomic location on chromosome 6 as identified by TAIL-  
 44 PCR of a randomly inserted hairpin transgene targeting the *Fbi-like* candidate gene  
 45 (Medtr8g060730). PCR using DNA template from the progeny of the WPT45-1-2 plant and chr6  
 46 transgene-insertion and transgene-specific primers was carried out. Results from this screen  
 47 failed to conclusively confirm a homozygous plant. A second PCR assay was carried out on all  
 48 putative mutant plants and the presence of the hairpin transgene was detected in all plants,  
 49 suggesting the presence of a multi-copy T-DNA insertion that has not been characterized  
 50 further. All 24 transgene positive mutant plants were used for the phenotype analysis. **c**, The  
 51 genomic location on chromosome 2 as identified by TAIL-PCR of a randomly inserted hairpin  
 52 transgene targeting the *Erdj2* candidate gene (Medtr2g044580). A PCR assay using DNA from  
 53 the progeny of WPT124-12 plant as template and insertion specific primers identified a

54 homozygous plant (WPT124-12-4) that was selfed, and its progeny seed used for the phenotype  
55 analysis.

56

57

58

59

60

61

62

63

64

65

66

67

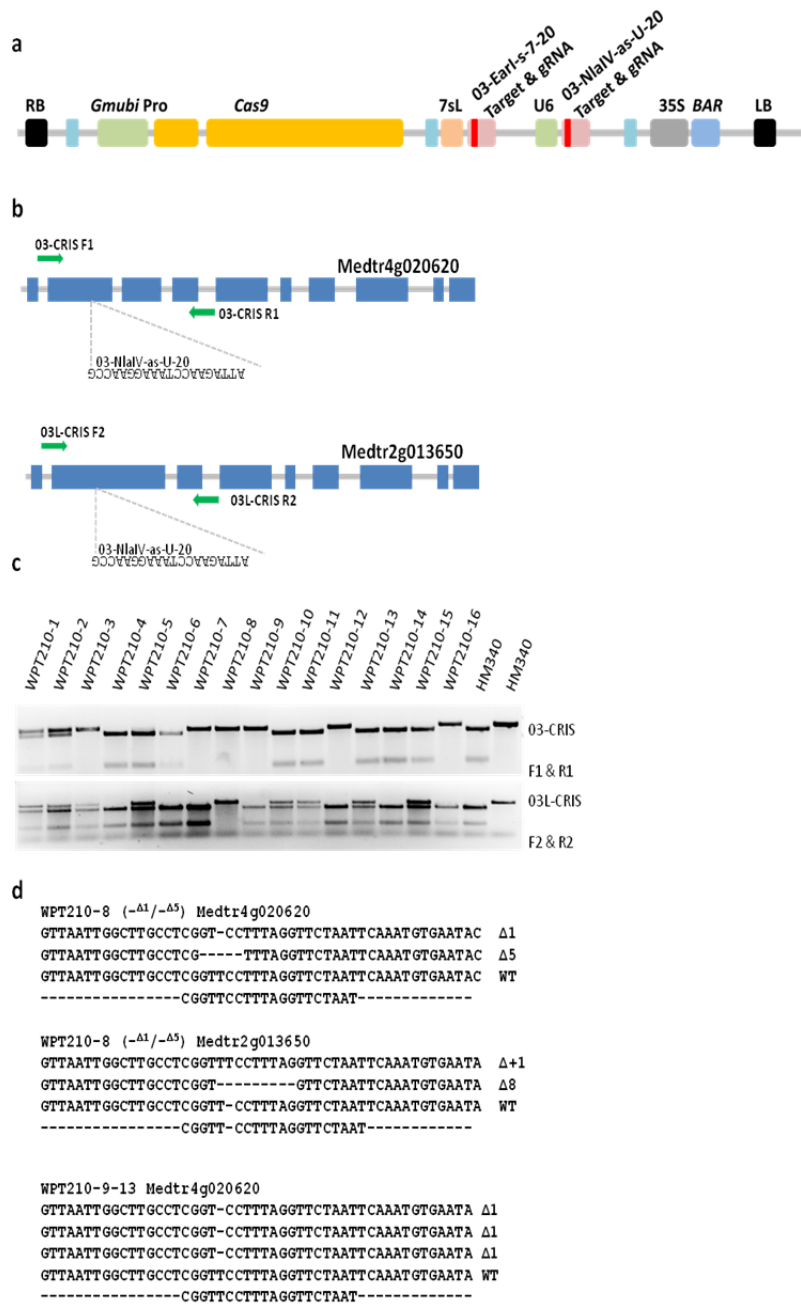

68

69 **Fig. S3 The characterization of the *Pho2-like* CRISPR/Cas9 mutants.** a, A schematic  
70 representation of the CRISPR/Cas9 reagent used to target the *Pho2-like* gene (Medtr4g020620).  
71 Although, not a candidate gene in this study, a homolog of *Pho2-like* located at Medtr2g013650  
72 was also a target of the same CRISPR/Cas9 reagent. b, The genomic loci of both *Pho2-like* genes  
73 in Medicago and the U6 gRNA target sites at the second exon of both genes. The 7sL targets  
74 (not depicted) are typically validated only when U6 targets fail to generate mutations. c, A gel

75 depicting the PCR-digest assay showing both homozygous and heterozygous single and double  
76 mutants at the T<sub>0</sub> generation for the *Pho2-like* and homolog genes. The assay was used to  
77 determine the mutation frequency of the U6 target in 16 T<sub>0</sub> Medicago plants. Primer pairs  
78 specific to either *Pho2-like* gene (Medtr4g020620) or *Pho2-like* homolog (Medtr2g013650) was  
79 used to generate a gene-specific amplicon that are digested with the restriction enzyme NlaIV  
80 post-PCR. NlaIV-resistant amplicons indicate homozygous mutant plants, two bands indicate  
81 wild-type and three bands indicate heterozygous plants. The homozygous T<sub>0</sub> plant *Pho2-like*  
82 (WPT210-9) was used for the phenotype analysis in this study. Screening of the WP210-9 T<sub>1</sub>  
83 plants identified a non-transgenic plant where the transgene had been removed by genetic  
84 segregation (WPT210-9-13). The sequencing of this plant also confirmed heritable transmission  
85 of the same 1-bp deletion observed in the T<sub>0</sub> plant and no evidence of wild-type alleles. **d**,  
86 Amplicons were cloned and sequenced to confirm T<sub>0</sub> mutations in several of the six T<sub>0</sub>  
87 homozygous line. In addition, we also identified a quad-allelic T<sub>0</sub> double mutant of *Pho2-like*  
88 (Medtr4g020620) and *Pho2-like* homolog (Medtr2g013650) (WPT210-8), highlighting the  
89 striking efficiency and efficacy of the CRISPR reagent.

90

91

92

93

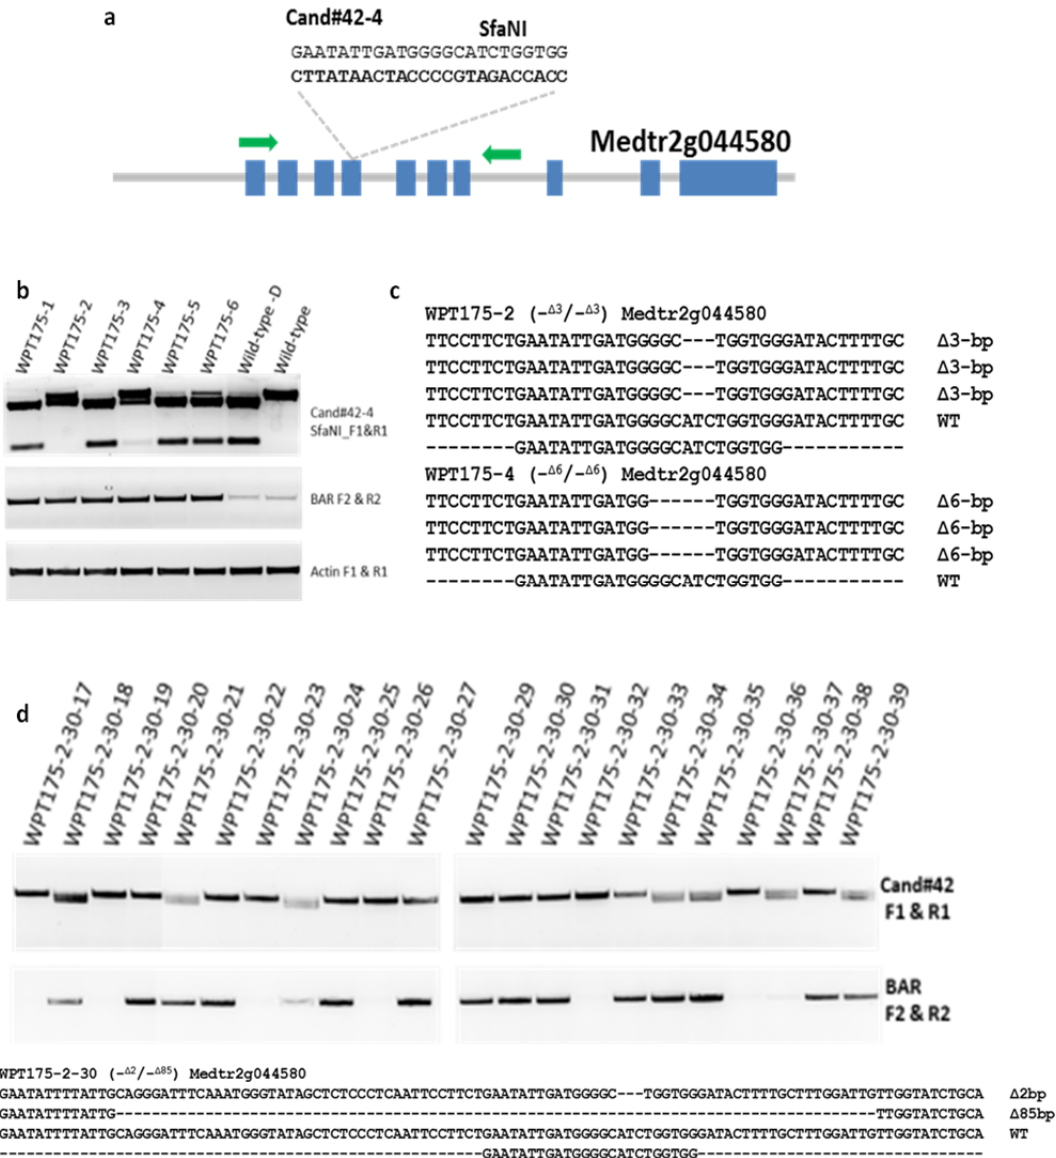

94  
95  
96  
97

98 **Fig. S4 The characterization of the *Erdj2* CRISPR/Cas9 mutants** The genomic loci of the *Erdj2*  
99 gene in Medicago and the U6 gRNA target sites at the fourth exon. **b**, A PCR-digest assay  
100 spanning the *Erdj2* target site of 6  $T_0$  plants from the transformation event WPT175. The  
101 CRISPR/Cas9 reagent was highly active, generating 2 putative  $T_0$  homozygous mutant plants and  
102 one heterozygous plants. Amplicons were digested post-PCR with the restriction enzyme SfaNI.  
103 SfaNI-resistant amplicons indicate homozygous mutant plants, two bands indicate wild-type

104 and three bands indicate heterozygous plants. **c**, Putative homozygous plants WPT175-2 and  
105 WPT175-4 were sequenced and a 3-bp and a 6-bp deletions at the target site respectively were  
106 confirmed. **d**, We checked the heritable transmission of the 3-bp deletion in the WPT175-2  
107 progeny (WPT175-2-30) and a second mutant allele was observed that was previously  
108 overlooked. Sequencing confirmed that this second mutation was a frame-shift 85-bp deletion  
109 that can be screened by PCR without digestion, since the amplicons are a combination of the  
110 485-bp amplicon (3-bp mutant allele) and a 403-bp amplicon (85-bp mutant allele). The two  
111 alleles can be conveniently visualized by gel electrophoresis separation. Using this PCR strategy  
112 we screened forty plants to try to identify a plant harboring both 85-bp frame-shift deletions,  
113 however we could not identify this plant, suggesting that the candidate *Erdj2* gene is  
114 gametophytic lethal. In addition, we observed removal of the transgene in several plants  
115 segregating for the two mutant alleles (3-bp and 85-bp) and confirmed a plant which had 3-bp  
116 and 85-bp deletion without a transgene (WPT175-2-30-37).

117  
118  
119



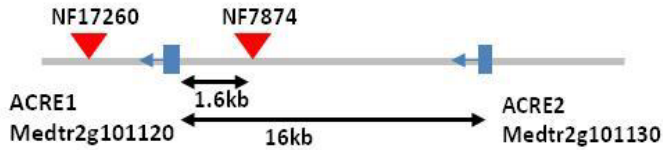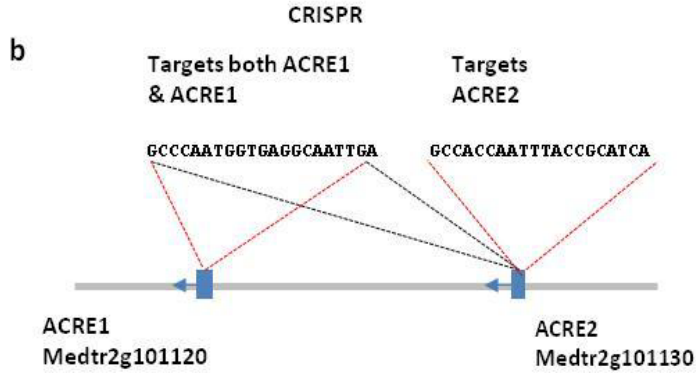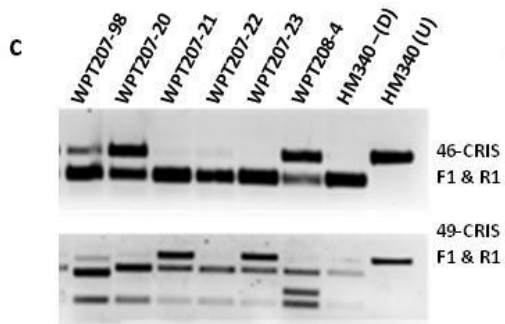

**d** WPT208-4 (+/-<sup>A1</sup>) Medtr2g101120

```

GGGCGTAGCCCAATGGTGAGGCAATTGAGGGTG WT
GGGCGTAGCCCAATGGTGAGGCAAT-GAGGGTG Δ1
GGGCGTAGCCCAATGGTGAGGCAATTGAGGGTG WT
-----GCCCAATGGTGAGGCAATTGA-----

```

WPT207-20 (+/-<sup>A9</sup>) Medtr2g101120

```

GGGCGTAGCCCAATGGTGAGGCAATTGAGGGTG WT
GGGCGTAGCCCAATGGTGAGG-----GTG Δ9
GGGCGTAGCCCAATGGTGAGGCAATTGAGGGTG WT
-----GCCCAATGGTGAGGCAATTGA-----

```

**e**

WPT208-4-2

```

GGGCGTAGCCCAATGGTGAGG-----GTG Δ9
GGGCGTAGCCCAATGGTGAGG-----GTG Δ9
GGGCGTAGCCCAATGGTGAGG-----GTG Δ9
GGGCGTAGCCCAATGGTGAGGCAATTGAGGGTG WT
-----GCCCAATGGTGAGGCAATTGA-----

```

WPT208-4-16

```

GGGCGTAGCCCAATGGTGAGG-----GTG Δ9
GGGCGTAGCCCAATGGTGAGG-----GTG Δ9
GGGCGTAGCCCAATGGTGAGG-----GTG Δ9
GGGCGTAGCCCAATGGTGAGGCAATTGAGGGTG WT
-----GCCCAATGGTGAGGCAATTGA-----

```

120

121

122 **Fig. S5 The characterization of the *Acre-1* CRISPR/Cas9 mutants.** **a**, The Noble Tnt1 mutant  
123 database was queried to identify Tnt1 insertion mutants at the *Acre-1* locus (Medtr2g10120)  
124 however none were found. Therefore, we attempted to identify insertions by using the gene  
125 specific PCR-based reverse screening service provided by the Noble foundation. Two insertion  
126 lines were identified from this screen, NF17260 and NF7874, however closer analysis revealed  
127 that neither one of these insertions had disrupted the reading frame or promoter region of  
128 *Acre-1*. In addition, a second paralog copy of the gene (*Acre-2*) was identified 16kb upstream of  
129 *Acre-1*, and there was interest in generating a mutant for this gene in case gene redundancy  
130 confounded future phenotype analyses. **b**, A CRISPR/Cas9 reagent that targeted the reading  
131 frame of both *Acre-1* and *Acre-2* was constructed with the goal of obtaining a series of single  
132 and double mutants, and possibly a large deletion (~16kbp) whereby both loci were removed.  
133 Two guide RNAs were engineered, one a U6 gRNA targeting both 5' coding regions of *Acre-1*  
134 and *Acre-2* and the second 7SL gRNA targeting the middle region of both genes. **c**, During T<sub>0</sub>  
135 screening of plants for targeted mutations in the both genes we noticed a SNP at the U6 target  
136 of *Acre-1* and that no mutation activity could be detected at this locus. We therefore screened  
137 the 7SL target locus and identified mutations in both genes at high frequency. **d**, We identified  
138 a T<sub>0</sub> heterozygous mutant plant and sequenced confirmed a frame-shift 1-bp deletion in the  
139 coding region of *Acre-1* (WPT208-4). **e**, The T<sub>0</sub> WPT208-4 was selected for the phenotype  
140 analysis and approximately 90 heterozygous plants were PCR-digest screened to confirm  
141 heritable transmission of the mutation at the expected segregation frequency. From this assay  
142 we recovered approximately 24 mutant plants and observed the expected segregation  
143 frequencies. Intriguingly, sequence confirmation of the mutation in T<sub>1</sub> plants revealed a  
144 consistent 9-bp in-frame mutation in several plants (WPT208-4-2 & WPT208-4-16), differing  
145 from the initial 1-bp deletion observed in the T<sub>0</sub>. This observation is not uncommon, and more  
146 thorough screening of T<sub>0</sub> plants may be required.

147

148

149

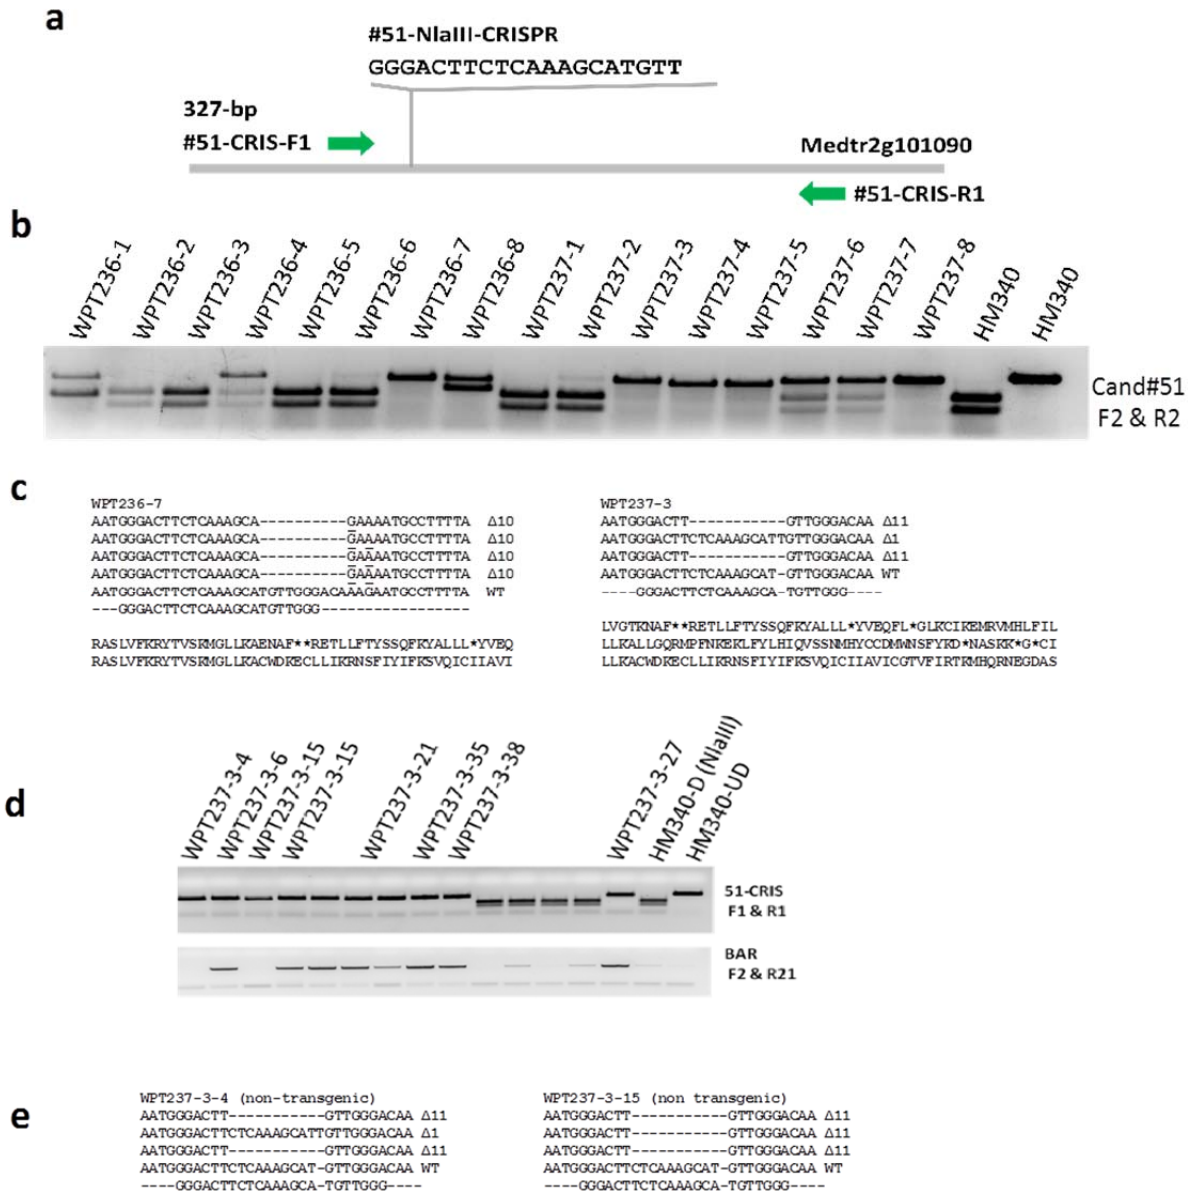

150

151

152 **Fig. S6 The characterization of the *Pen3-like* CRISPR/Cas9 mutants in whole plant Medicago.**

153 **a**, The genomic loci of the *Pen3-like* gene in Medicago and the U6 gRNA target sites at the third

154 exon. **b**, A PCR-digest assay spanning the *Pen3-like* target site of 16 T<sub>0</sub> plants from two

155 independent transformations, WPT236 and WPT237 was carried out. The CRISPR/Cas9 reagent

156 was highly active, generating five T<sub>0</sub> homozygous mutant plants as well as several heterozygous

157 plants. Amplicons were digested post-PCR with the restriction enzyme NlaIII. NlaIII-resistant

158 amplicons indicate homozygous mutant plants, two bands indicate wild-type and three bands  
159 indicate heterozygous plants. **c**, We planned to use the WPT236-7 plants for the phenotype  
160 analysis since this plant had identical 10-bp mutant alleles. However, we had difficulty  
161 germinating  $T_1$  seed from this plant for reasons not known and therefore used  $T_1$  seed from a  
162 second homozygous  $T_0$  plant (WPT237-3). This plant had a segregating bi-allelic mutation of 1-  
163 bp (insertion) and 11-bp (deletion), both frame-shift mutations resulting in-frame stop codons.  
164 **d**, Ten  $T_1$  mutant plants from WPT237-3 were screened by a PCR-digest assay to confirm  
165 heritable transmission of the homozygous mutation. **e**, Amplicons from these mutant plants  
166 were sequenced to confirm mutations and same  $T_0$  mutant alleles were observed in the  $T_1$   
167 plants. Two homozygous plants, one with a 1-bp and 11-bp biallelic mutation (WPT237-4) and  
168 the other with a mono-allelic 11-bp mutation (WPT237-3-15) were identified as non-transgenic  
169 resulting from the removal of their transgene by genetic segregation.  
170

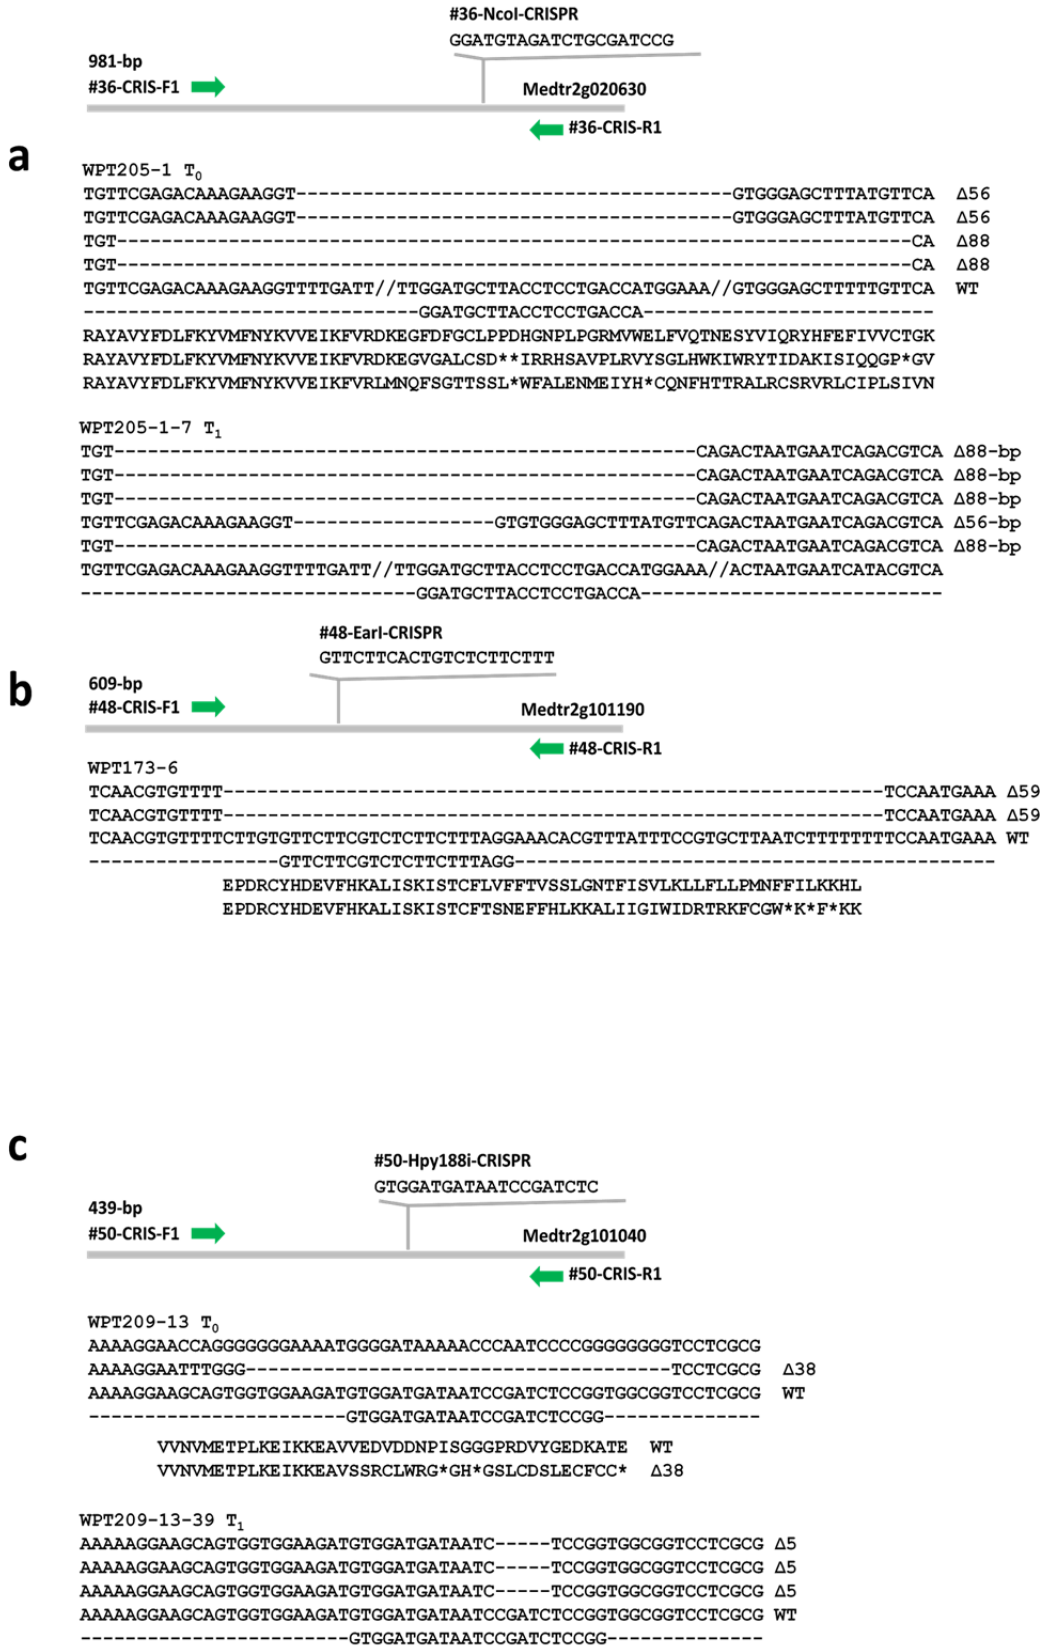

172

173 **Fig. S7 The characterization of the *Fmo1-like*, *Hlz-1* and *Mel1-like* CRISPR/Cas9 mutants in**  
174 **whole plant *Medicago*.** **a**, A *Fmo1-like* homozygous T<sub>0</sub> mutant was generated by a CRISPR/Cas9  
175 reagent designed to target the locus. The T<sub>0</sub> plant consisted of frame-shift bi-allelic mutations  
176 of 56bp and 88bp that disrupted the reading frame of the gene. To confirm heritable  
177 transmission of the mutations a PCR-digestion assay was performed on all mutant plants used  
178 in the phenotype analysis. Results from this assay indicated that mutant plants were  
179 homozygous. Several T<sub>1</sub> mutant plants were sequenced to confirm the same mutations  
180 observed in the T<sub>0</sub> plant (WPT205-1-7). We also detected activity from the second guide RNA  
181 from the CRISPR reagent used to target *Fmo1-like* at Medtr2g020630. The 7SL target  
182 inadvertently had target homology to a second *Fmo1-like* gene at Medtr2g043850. Putative  
183 double mutant plants have a striking dwarf phenotype and were excluded from the phenotype  
184 analysis. **b**, The T<sub>0</sub> heterozygous mutant plant WPT173-6 harboring a 59-bp deletion in the  
185 coding region of the *Hlz1-like* gene (Medtr2g101190) was identified. T<sub>1</sub> progeny were screened  
186 by a PCR-digest assay and heritable transmission of the mutation was confirmed by the  
187 recovery 18 homozygous plants that were used for the phenotype analysis. **c**, The screening of  
188 a *Mel1-like* heterozygous T<sub>0</sub> mutant plant generated by a CRISPR/Cas9 reagent revealed a plant  
189 with wild-type and a mutant allele with a 38-bp deletion (WPT209-13). We expected this  
190 mutation to be heritably transmitted at the expected segregation ratio. However when we  
191 screened approximately 90 plants using a PCR digestion assay to detect homozygous plants,  
192 only seven mutant plants appeared to be homozygous. Moreover, sequence confirmation of  
193 these plants indicated a different (5-bp) mutation observed at the target (WPT209-13-39). Due  
194 to the odd heritable transmission of these mutations, a future more robust phenotype analysis  
195 should be carried out using completely characterized progeny.

196

197

198

199

200

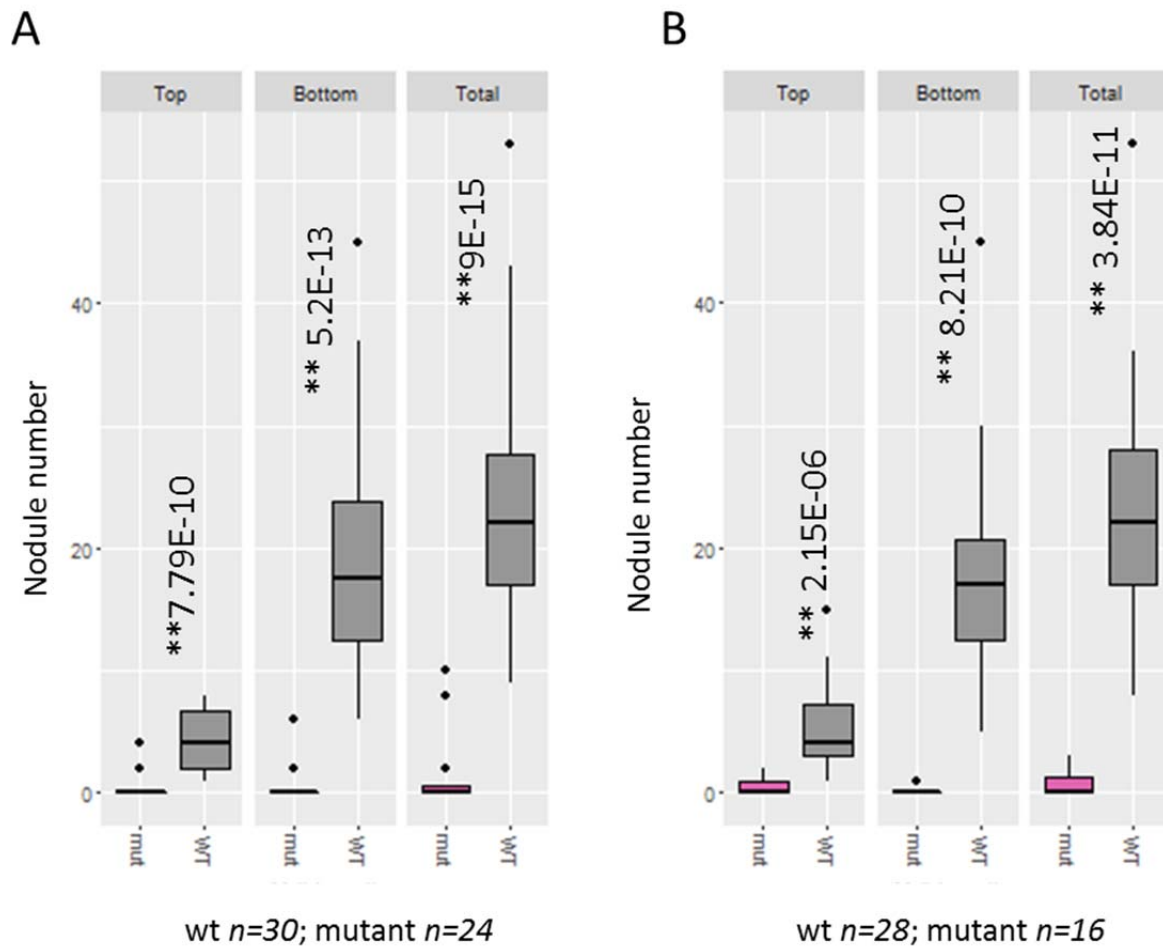

201

202

203 **Fig. S8** Nodulation phenotype analysis of two previously characterized nodulation mutants,  
204 TRV25 *dmi3* and NF5939 *ipd3-2*. (A)

205

206

A

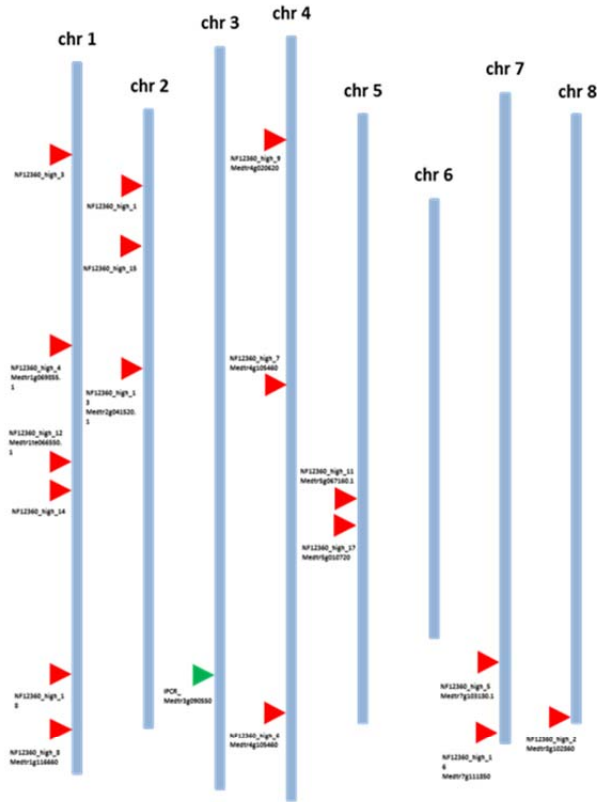

B

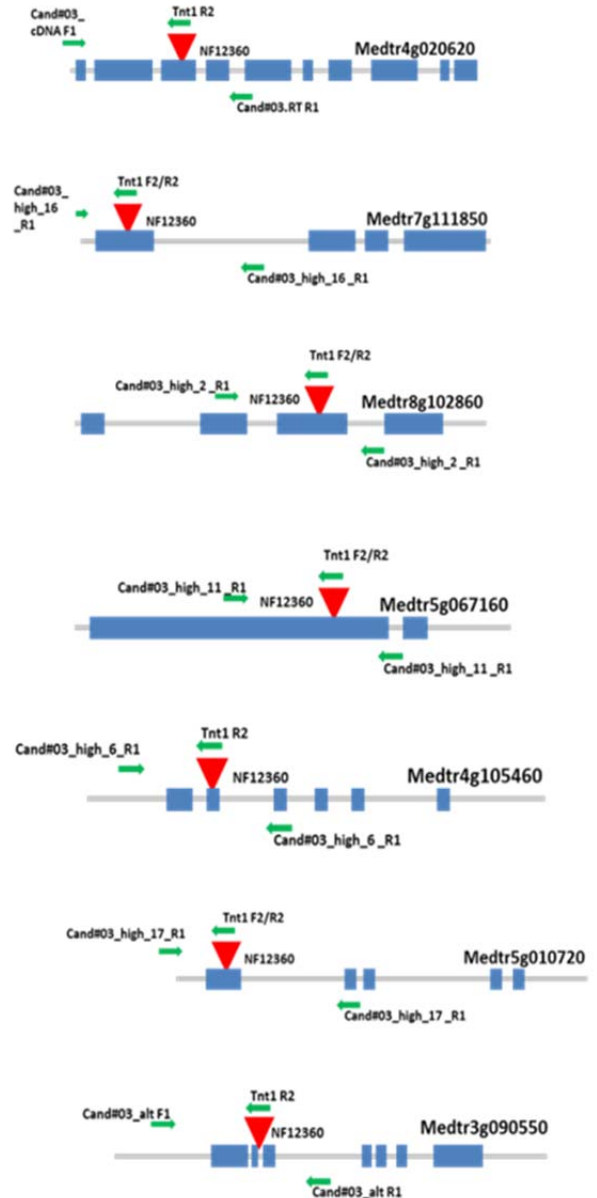

C

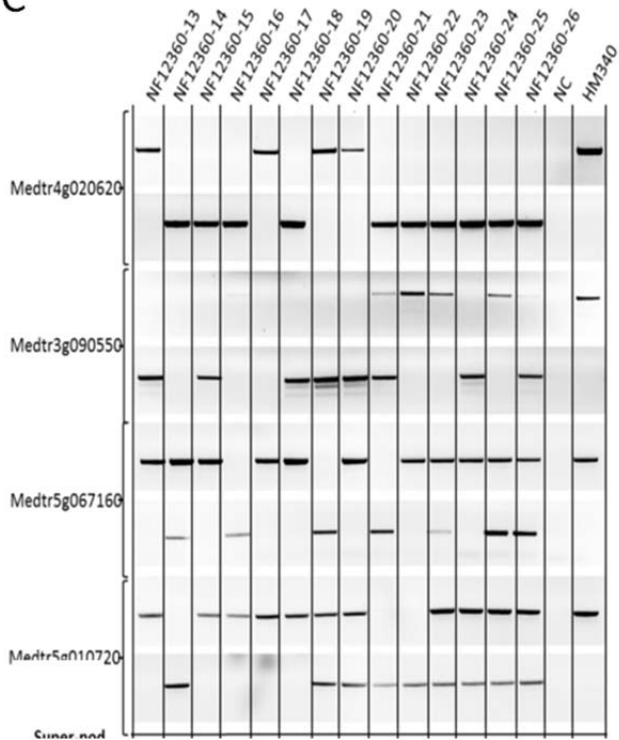



208 **Fig. S9 The Tnt1 Insertion background of the NF12360 Tnt1 mutant line.** **a**, The eight Medicago  
209 chromosomes indicating the approximate Tnt1 insertion sites obtained from Noble Foundation  
210 Tnt1 database. Using this approach we identified 17 Tnt1 insertions in line NF12360. In  
211 addition, we used inverse-PCR (IPCR) to identify an extra insertion (green). **b**, Several of these  
212 insertion events are located in coding regions of random genes. **c**, Segregation profile of four  
213 genes disrupted by a Tnt1, the gel also indicates that many of the insertions are homozygous.  
214

HM340  
Inoculated

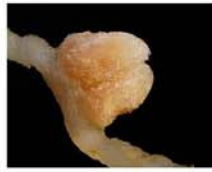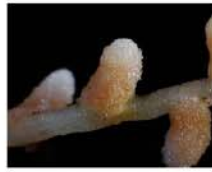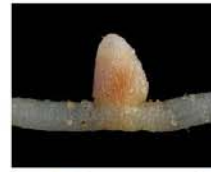

*pho2-like*<sub>CRISPR</sub>

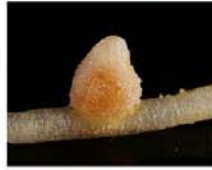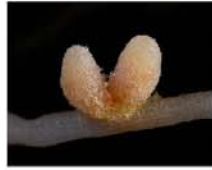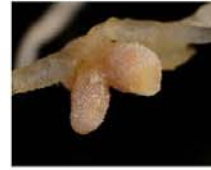

*pen3-like*<sub>CRISPR</sub>

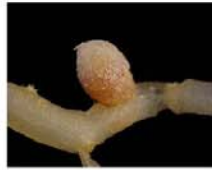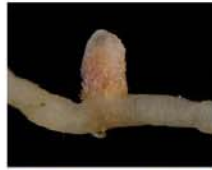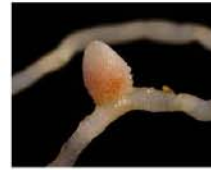

*pno1-like*<sub>HP</sub>

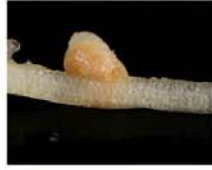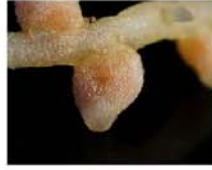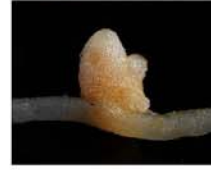

*pho2-like*<sub>WT</sub>

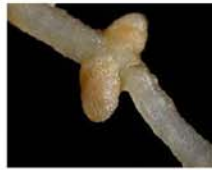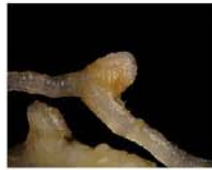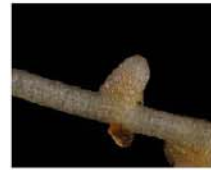

*pho2-like*<sub>Tnt</sub>

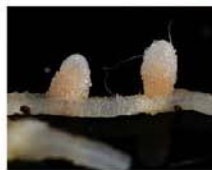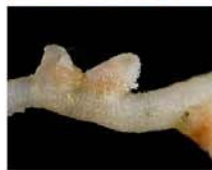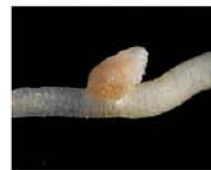

*pen3-like*<sub>WT</sub>

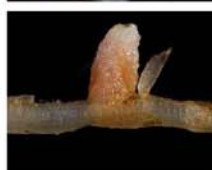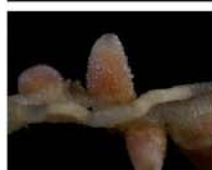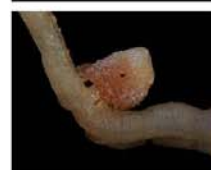

*pen3-like*<sub>Tnt</sub>

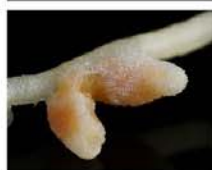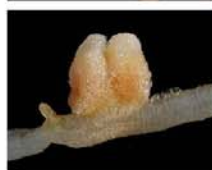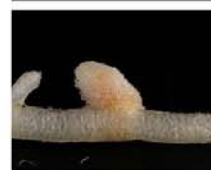

*pno1-like*<sub>WT</sub>

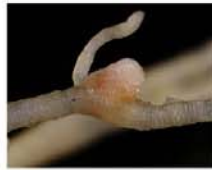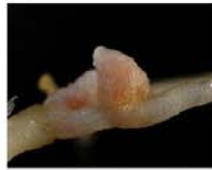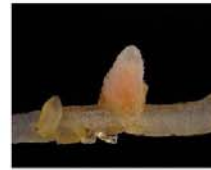

*pno1-like*<sub>Tnt</sub>

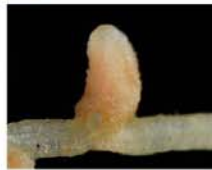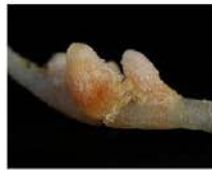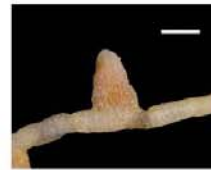

216 **S10. WT and *Pho2-like*, *Pen3-like*, and *Pno1-like* mutant nodules at 14 dpi.** Three plants for  
217 each line were harvested at 14 dpi. For each plant the second or third nodule from the top is  
218 shown close up. The scale bar indicates 1 mm.  
219

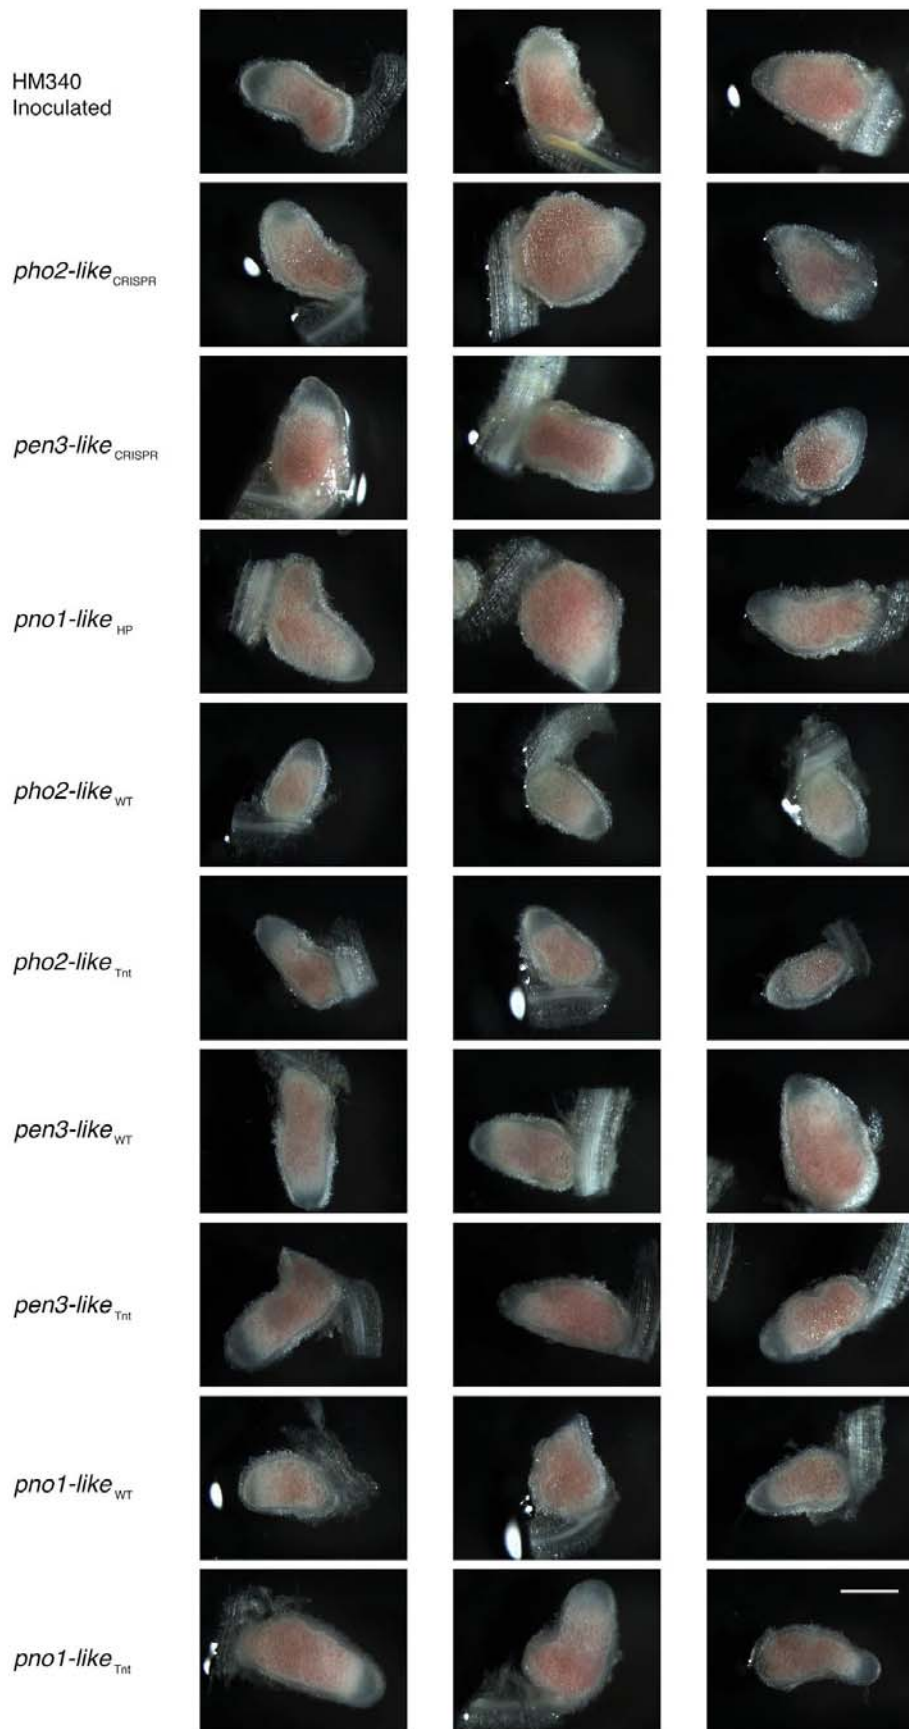

221 **S11. WT and *Pho2-like*, *Pen3-like*, and *Pno1-like* mutant dissected nodules at 14 dpi.** Three  
222 plants for each line were harvested at 14 dpi. For each plant the second or third nodule from  
223 the top was cut in half longitudinally and examined under a stereo microscope. The scale bar  
224 indicates 1 mm.  
225

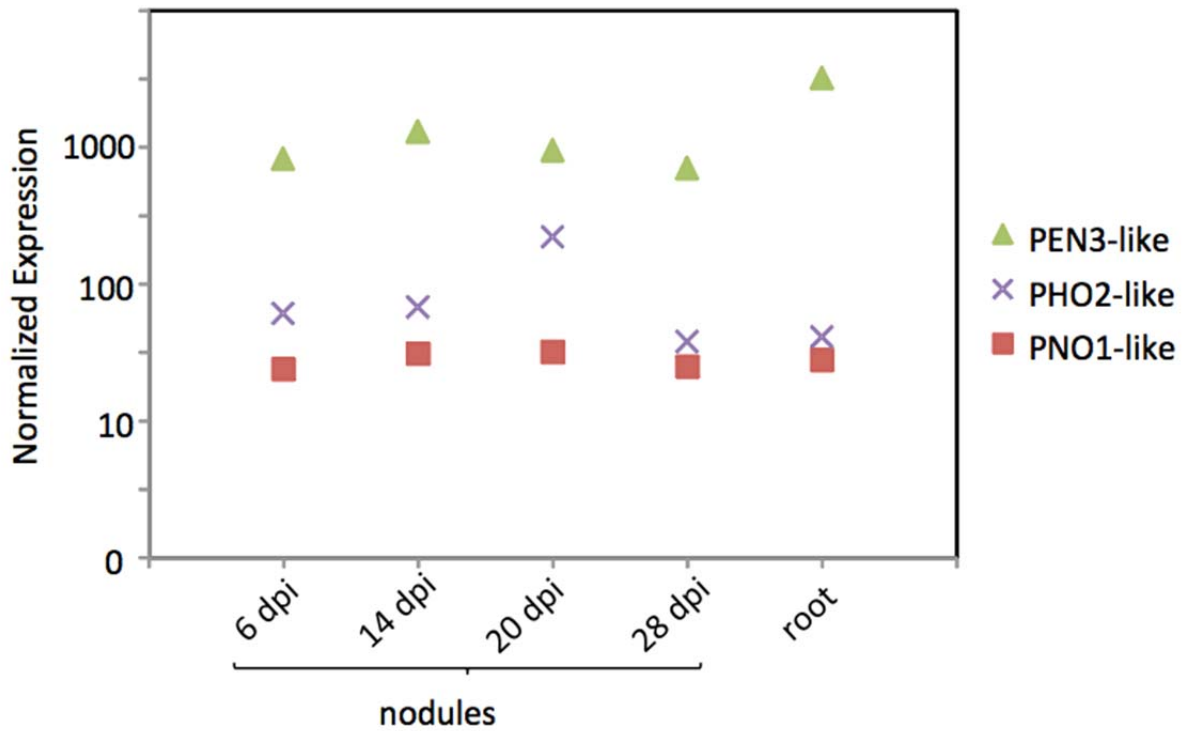

226

227

228 **Fig. S12. The Expression levels of three validated candidate genes in roots and nodules.**

229 PEN3-like shows high expression in nodules and roots, with expression in nodules, peaking

230 modestly at 14 dpi. PHO2-like is expressed at relatively low levels in roots and nodules, with

231 peak expression in nodules at 20 dpi. PEN1-like is expressed at very low levels in both nodules

232 and root tissue with little change over time. Data are from the *Medicago truncatula* Gene

233 Expression Atlas (<http://mtgea.noble.org/v3/index.php>). Note vertical axis is on a log scale.

234

235

236

237

239 **Table S1.** List of the Tnt1 mutant lines obtained from the Noble Foundation Tnt1 mutant  
 240 database. <http://medicago-mutant.noble.org/mutant/>. Tnt1 insertion could not be identified in  
 241 several lines. In addition, candidate mutants that could not be identified in the mutant  
 242 database were identified by a PCR-based reverse screen. Identification in a PCR-based reverse  
 243 screen often produced false positives and in most cases insertions did not disrupt the gene of  
 244 interest or could not be found.

| Candidate | Gene Name     | Line No. |                            | Status                                    |
|-----------|---------------|----------|----------------------------|-------------------------------------------|
| 2         | Medtr2g020620 | NF14883  | ordered from database      | Insert not found                          |
| 2         | Medtr2g020620 | NF2136   | ordered from database      | Insert not found                          |
| 3         | Medtr4g020620 | NF12360  | ordered from database      | Homozygous and wild-type plant identified |
| 24        | Medtr8g060730 | NF17407  | ordered from database      | Insert not found                          |
| 24        | Medtr8g060730 | NF17277  | ordered from database      | Homozygous and wild-type plant identified |
| 24        | Medtr8g060730 | NF19232  | ordered from database      | Insert not found                          |
| 30        | Medtr8g018370 | NF12320  | ordered from database      | Insert not found                          |
| 30        | Medtr8g018370 | NF20885  | ordered from database      | Heterozygous plant recovered and bulked   |
| 33        | Medtr5g088410 | NF11825  | ordered from database      | Homozygous and wild-type plant identified |
| 33        | Medtr5g088410 | NF13140  | ordered from database      | Insert not found                          |
| 34        | Medtr8g073550 | NF16011  | ordered from database      | Insert not found                          |
| 36        | Medtr2g020630 | NF11089  | ordered from database      | Homozygous and wild-type plant identified |
| 38        | Medtr3g014710 | NF15060  | ordered from database      | Insert not found                          |
| 38        | Medtr3g014710 | NF20362  | ordered from database      | Insert not found                          |
| 39        | Medtr2g059590 | NF12197  | ordered from database      | Insert not found                          |
| 39        | Medtr2g059590 | NF20479  | ordered from database      | Homozygous and wild-type plant identified |
| 39        | Medtr2g059590 | NF4387   | ordered from database      | Insert not found                          |
| 41        | Medtr2g044570 | NF15195  | ordered from database      | Heterozygous plant recovered and bulked   |
| 41        | Medtr2g044570 | NF11192  | ordered from database      | Insert not found                          |
| 42        | Medtr2g044580 | None     | n/a                        | None found                                |
| 44        | Medtr2g087630 | None     | n/a                        | None found                                |
| 45        | Medtr3g079860 | NF11648  | ordered from database      | Homozygous and wild-type plant identified |
| 46        | Medtr2g101120 | NF17260  | PCR-based reverse screened | Insert not found                          |
| 46        | Medtr2g101120 | NF7874   | PCR-based reverse screened | Insert not found                          |
| 47        | Medtr2g101180 | NF12123  | PCR-based reverse screened | Insert not found                          |
| 47        | Medtr2g101180 | NF11016  | PCR-based reverse screened | Insert not found                          |
| 48        | Medtr2g101190 | NF12952  | PCR-based reverse screened | Insert not found                          |
| 48        | Medtr2g101190 | NF10218  | PCR-based reverse screened | Homozygous and wild-type plant identified |
| 49        | Medtr2g101130 | None     | PCR-based reverse screened | None found                                |
| 50        | Medtr2g101040 | NF4794   | PCR-based reverse screened | Insert not found                          |
| 50        | Medtr2g101040 | NF12520  | PCR-based reverse screened | Insert not found                          |
| 51        | Medtr2g101090 | NF2826   | PCR-based reverse screened | Homozygous and wild-type plant identified |

246 **Table S2.** Results from statistical tests comparing phenotypes (nodule number, N content) of mutant  
 247 and wild-type control plants. Results for validated genes are in bold.

| Candidate        | Mutant type                                     | Number of mutant / wt plants | P value nodules | Number of mutant mean (sd) | Number of wt mean (sd)  | % N <sup>a</sup> | Paired wild type % N | t <sub>df=4</sub> | P value of N content |
|------------------|-------------------------------------------------|------------------------------|-----------------|----------------------------|-------------------------|------------------|----------------------|-------------------|----------------------|
| <b>PHO2-like</b> |                                                 |                              |                 |                            |                         |                  |                      |                   |                      |
| Medtr4g020620    | <i>pho2-like</i> <sub>Tnt</sub>                 | 29 / 36                      | <0.001          | 13 (4.9)                   | 23 (9.9)                | 3.38             | 3.40                 | NA <sup>b</sup>   | NA                   |
|                  | <i>pho2-like</i> <sub>CRISPR</sub> <sup>c</sup> | 23 / 24                      | 0.002           | 42 (13)                    | 53 (10.1)               | 4.18             | 4.15                 | 0.23              | 0.83                 |
|                  | <i>pho2-like</i> <sub>CRISPR</sub> <sup>c</sup> | 24 / 24                      | 0.003           | 25.4 (6.6)                 | 33.6 (11.0)             |                  |                      |                   |                      |
| <b>FBL1-like</b> |                                                 |                              |                 |                            |                         |                  |                      |                   |                      |
| Medtr8g060730    | <i>fbl1-like</i> <sub>hp</sub>                  | 22 / 22                      | 0.11            | 33.6 (10)                  | 39.1(12.6)              |                  |                      |                   |                      |
| <b>PNO1-like</b> |                                                 |                              |                 |                            |                         |                  |                      |                   |                      |
| Medtr5g088410    | <i>pno1-like</i> <sub>Tnt</sub>                 | 22 / 17                      | 0.02            | 24 (11.8)                  | 34 (14.1)               | 3.58             | 3.91                 | 2.12              | 0.1                  |
|                  | <i>pno1-like</i> <sub>hp</sub>                  | 24 / 24                      | 0.003           | 27 (8.2)                   | 37.3(11.1) <sup>d</sup> | 4.44             | 4.15                 | 0.85              | 0.19                 |
| <b>FMO1-like</b> |                                                 |                              |                 |                            |                         |                  |                      |                   |                      |
| Medtr2g020630    | <i>fmo1-like</i> <sub>Tnt</sub>                 | 24 / 24                      | 0.01            | 35.7 (7.6)                 | 29.7 (8)                |                  |                      |                   |                      |
|                  | <i>fmo1-like</i> <sub>CRISPR</sub>              | 21 / 25                      | 0.93            | 45 (18.2)                  | 45.4(13.9)              |                  |                      |                   |                      |
| <b>RFP1-like</b> |                                                 |                              |                 |                            |                         |                  |                      |                   |                      |
| Medtr2g044570    | <i>rfp1-like</i> <sub>Tnt</sub>                 | 23 / 23                      | 0.94            | 25.8 (7.4)                 | 26 (7.7)                |                  |                      |                   |                      |
| <b>ERDJ2</b>     |                                                 |                              |                 |                            |                         |                  |                      |                   |                      |
| Medtr2g044580    | <i>erdj2</i> <sub>hp</sub>                      | 24 / 24                      | 0.15            | 33 (12.7)                  | 39 (13.6)               |                  |                      |                   |                      |
|                  | <i>erdj2</i> <sub>CRISPR</sub> <sub>6</sub>     | 7 / 24                       | 0.23            | 32.8 (9.3)                 | 37.3(11.1) <sup>d</sup> |                  |                      |                   |                      |
|                  | <i>erdj2</i> <sub>CRISPR</sub> <sub>3/85</sub>  | 23 / 23                      | 0.016           | 30.3 (7.6)                 | 37.3(11.1) <sup>d</sup> |                  |                      |                   |                      |
|                  | <i>erdj2</i> <sub>CRISPR</sub> <sub>3/85</sub>  | 62 / 11                      | 0.47            | 36 (11.8)                  | 34 (12.8)               |                  |                      |                   |                      |
| <b>ACRE1</b>     |                                                 |                              |                 |                            |                         |                  |                      |                   |                      |
| Medtr2g101120    | <i>acre1</i> <sub>CRISPR</sub>                  | 24 / 23                      | 0.60            | 62 (18.3)                  | 59 (19.1)               |                  |                      |                   |                      |
| <b>HLE1-like</b> |                                                 |                              |                 |                            |                         |                  |                      |                   |                      |
| Medtr2g101190    | <i>hlz1-like</i> <sub>Tnt</sub>                 | 25 / 11                      | 0.001           | 54 (20)                    | 35 (13.2)               |                  |                      |                   |                      |
|                  | <i>hlz1-like</i> <sub>CRISPR</sub>              | 18 / 29                      | 0.35            | 48 (17.6)                  | 53 (5.7)                |                  |                      |                   |                      |
| <b>MEL1</b>      |                                                 |                              |                 |                            |                         |                  |                      |                   |                      |
| Medtr2g101040    | <i>mel1</i> <sub>CRISPR</sub> <sup>e</sup>      | 7 / 15                       | 0.21            | 39 (14.5)                  | 48 (13.6)               |                  |                      |                   |                      |
|                  | <i>mel1</i> <sub>CRISPR</sub> <sup>e</sup>      | 8 / 6                        | 0.60            | 23 (8.5)                   | 21 (8.7)                |                  |                      |                   |                      |
| <b>PEN3-like</b> |                                                 |                              |                 |                            |                         |                  |                      |                   |                      |
| Medtr2g101090    | <i>pen3-like</i> <sub>Tnt</sub>                 | 24 / 24                      | <0.001          | 24 (7.6)                   | 35 (11.2)               | 3.20             | 3.57                 | 0.85              | 0.44                 |
|                  | <i>pen3-like</i> <sub>CRISPR</sub>              | 10 / 21                      | 0.03            | 17.1 (8.0)                 | 24.1 (8.2)              | 4.09             | 4.15                 | 0.85              | 0.45                 |
| <b>Dmi3</b>      |                                                 |                              |                 |                            |                         |                  |                      |                   |                      |
|                  | <i>Dmi3</i>                                     | 24 / 30                      | <<0.001         | 1.08 (2.6)                 | 23.2 (9.8)              |                  |                      |                   |                      |
| <b>lpd3</b>      |                                                 |                              |                 |                            |                         |                  |                      |                   |                      |
|                  | <i>lpd3</i>                                     | 16 / 25                      | <<0.001         | 0.6 (1.0)                  | 22.7 (9.9)              |                  |                      |                   |                      |

248  
 249 <sup>a</sup>%N was calculated on three replicates per genotype.  
 250 <sup>b</sup>No t-test was conducted for *pho2-like*<sub>Tnt</sub> due to insufficient replication.  
 251 <sup>c</sup>The two CRISPR entries represent independent assays using the same mutant.  
 252 <sup>d</sup>The *PNO1-ike* wild-type control plants were used for the statistical tests involving the *ERDJ2* CRISPR lines. These  
 253 controls were grown in a rack next to, but not randomized with, the *ERDJ2* plants.  
 254 <sup>e</sup>The *MEL1* CRISPR assays were conducted at separate times but the mutants were derived from the same parent  
 255 plant.





276 Cool slowly to RT  
277 Dilute 1:500 with dH2O  
278 Use 1µL of solution in ligate reaction  
279

280 5. Clone target1 using a golden gate ligation of the target1 annealed primer product into  
281 the BsmBI(Esp3I) sites of the entry vector pAH595  
282

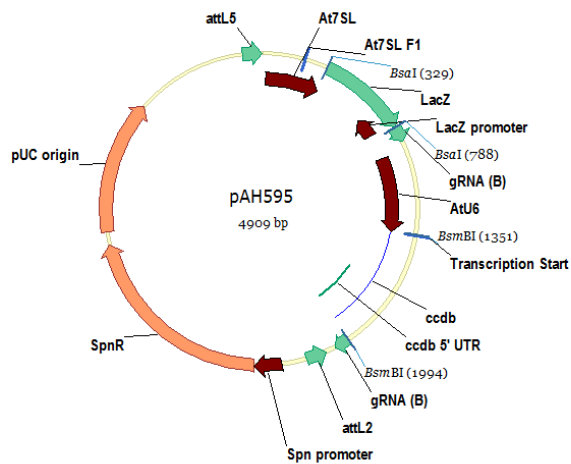

283  
284  
285 Target1 20µL GG reaction

286 2µL 10x T4 ligation buffer  
287 1µL pAH595  
288 1µL annealed oligo  
289 1µL Esp3I (BsmBI should be avoided since it requires a 50°C digestion temperature)  
290 1µL T4 ligase  
291 14µL dH2O

292  
293 Golden Gate Run Cycle

294  
295 37°C for 5 minutes + 16°C for 10 minutes  
296 10 cycles (the amount of cycles here can be reduced)  
297 37°C for 15 minutes

298 80°C for 5 minutes  
 299 Transform into DH5α competent cells and plate on Spec100.  
 300 Sequence confirm insertion with U6\_F1 primer AGAACAATAGTATTTCTTATATAGG  
 301

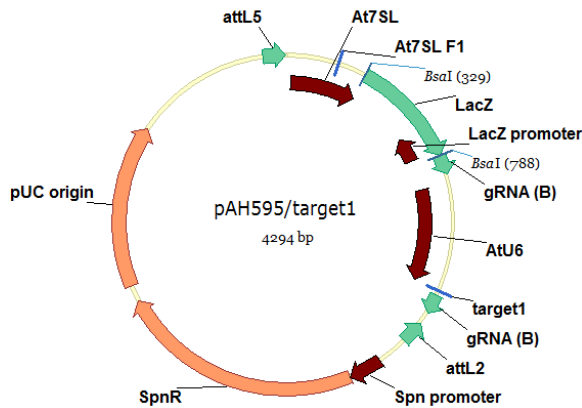

302  
 303  
 304 6. Repeat step #5 to introduce target2 into the BsaI sites of pAH595/target1 and sequence  
 305 confirm vector  
 306

307 Target 2 20μL GG reaction

- 308 2μL 10x T4 ligation buffer
- 309 1μL pAH595/target1
- 310 1μL annealed oligo
- 311 1μL BsaI
- 312 1μL T4 ligase
- 313 14μl dH2O

315 Golden Gate Run Cycle

- 316
- 317 37°C for 5 minutes + 16°C for 10 minutes
- 318 10 cycles (the amount of cycles here can be reduced)
- 319 37°C for 15 minutes
- 320 80°C for 5 minutes

321 Transform into DH5α competent cells and plate on Spec100 and X-gal for blue white  
322 selection

323 Select white colonies for mini-prep and sequence confirm.

324 Sequence confirm insertion with At7SL F1 primer CTATAATGGGACTCAAATAAGG

325

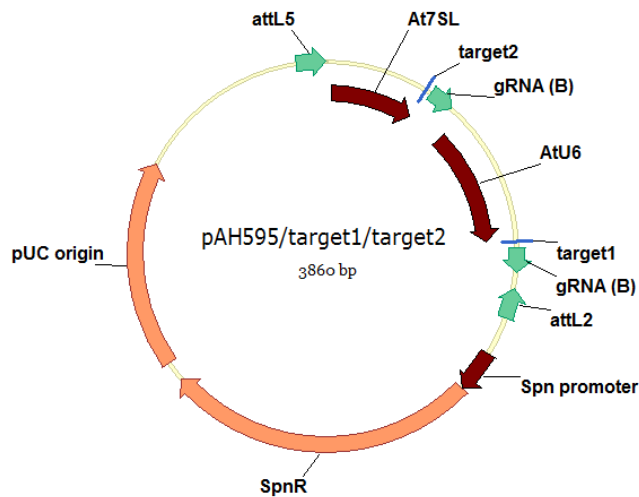

326

327

328 7. Carry out a mutli-site LR clonase reaction (Life Technologies) to introduce the completed  
329 guide RNA entry vector and Cas9 entry vector into a destination Gateway™ binary  
330 vector such as the pSC218GG used in this report.

331

332 8. LR clonase reaction

333

334 1μL pNJB184-4 Cas9-Intron entry vector

335 1μL p595/target1/target2 target guide RNA entry vecto

336 1μL Destination binary vector ( pSC218GG)

337 1μL LR clonase

338 1μL TE buffer

339 Incubate O/N at room temperature and transform into DH5α competent cells, Plate

340 ~120μL of Kan100 LB plates.

341 The following day select colonies and mini-  
 342 prep using a 15mL broth (pSC218GG is low-  
 343 copy number plasmid).

**pAH595/target1/target2 entry**

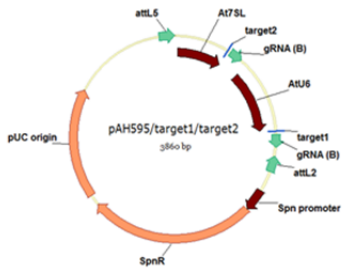

**pNJB184-4 Cas9 entry**

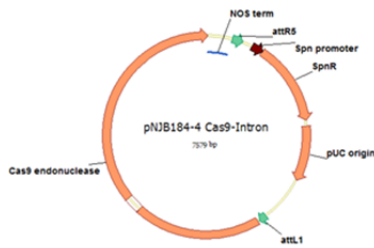

**Gmubi destination**

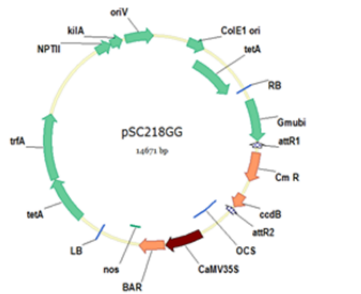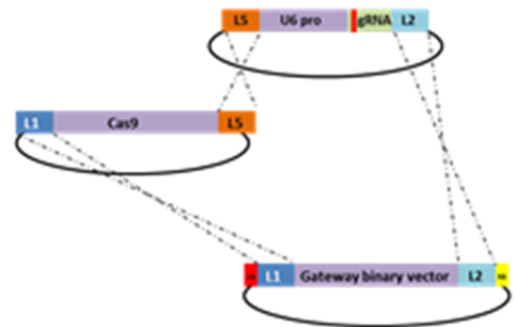

**Gmubi:Cas9:target1 & 2 guide  
 RNA CRISPR reagent**

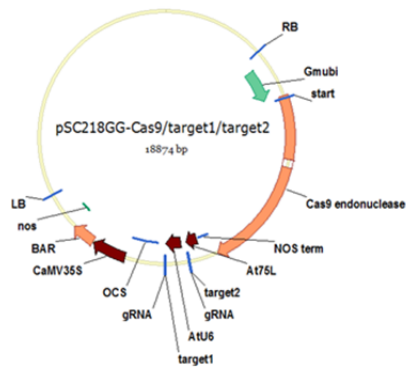

A representation of the multi-site Gateway™ LR clonase reaction used to incorporate Cas9 and the guide RNA entry vector into the final destination vector

344

345
